# Supplementary material
Source: publisher site journal article supplement (https://www.spandidos-publications.com/2156/downloadSupplementary)
Supplement: Supplementary file 1 [file downloadSupplementary]

## Sheet: Table SIII
Table SIII. The differentially expressed miRNAs in HUVEC treated with H2O2 compared to the HUVEC treated with H2O2 + Vitamin C.
Gene ID	HUVEC-H2O2-Expression	HUVEC-Vc-H2O2-Expression	HUVEC-H2O2-TPM	HUVEC-Vc-H2O2-TPM	Log2Ratio (HUVEC-Vc-H2O2/HUVEC-H2O2)	Up-Down-Regulation (HUVEC-Vc-H2O2/HUVEC-H2O2)	P-value	FDR
hsa-miR-8055	9	305	0.956556	33.9295	5.14855	Up	4.8954e-76	1.42462e-74
hsa-miR-3922-5p	1	33	0.106284	3.67107	5.1102	Up	3.80234e-09	2.14088e-08
hsa-miR-3976	1	32	0.106284	3.55982	5.06581	Up	7.26152e-09	3.98461e-08
hsa-miR-6871-3p	1	29	0.106284	3.22609	4.92379	Up	5.03206e-08	2.56556e-07
hsa-miR-8072	8	228	0.850272	25.3637	4.8987	Up	1.10457e-55	2.32589e-54
hsa-miR-4669	2	56	0.212568	6.22969	4.87316	Up	1.65776e-14	1.2703e-13
hsa-miR-1913	1	27	0.106284	3.0036	4.8207	Up	1.82031e-07	8.73077e-07
hsa-miR-6872-3p	4	107	0.425136	11.9032	4.80728	Up	1.61988e-26	1.91575e-25
hsa-miR-3124-3p	2	46	0.212568	5.11724	4.58937	Up	9.81492e-12	6.3871e-11
hsa-miR-3124-5p	1	23	0.106284	2.55862	4.58937	Up	2.34894e-06	9.87623e-06
hsa-miR-4524a-5p	1	23	0.106284	2.55862	4.58937	Up	2.34894e-06	9.86022e-06
hsa-miR-6861-5p	1	23	0.106284	2.55862	4.58937	Up	2.34894e-06	9.84426e-06
hsa-miR-6767-3p	1	22	0.106284	2.44738	4.52524	Up	4.4367e-06	1.79829e-05
hsa-miR-4665-3p	5	110	0.53142	12.2369	4.52524	Up	2.73282e-26	3.21727e-25
hsa-miR-2861	1	22	0.106284	2.44738	4.52524	Up	4.4367e-06	1.79548e-05
hsa-miR-6720-3p	2	44	0.212568	4.89475	4.52524	Up	3.4875e-11	2.19772e-10
hsa-miR-1224-5p	3	65	0.318852	7.23089	4.50321	Up	5.78834e-16	4.89928e-15
hsa-miR-4667-3p	3	65	0.318852	7.23089	4.50321	Up	5.78834e-16	4.88332e-15
hsa-miR-650	1	21	0.106284	2.33613	4.45813	Up	8.36674e-06	3.27834e-05
hsa-miR-6075	14	287	1.48798	31.9271	4.42336	Up	1.59638e-65	4.13461e-64
hsa-miR-4793-3p	15	303	1.59426	33.7071	4.40209	Up	7.10694e-69	1.87826e-67
hsa-miR-5189-5p	5	100	0.53142	11.1244	4.38774	Up	1.48328e-23	1.62097e-22
hsa-miR-5587-3p	1	20	0.106284	2.22489	4.38774	Up	1.57507e-05	5.96408e-05
hsa-miR-6759-3p	3	60	0.318852	6.67466	4.38774	Up	1.35105e-14	1.04143e-13
hsa-miR-4738-3p	2	39	0.212568	4.33853	4.35121	Up	8.167e-10	4.86265e-09
hsa-miR-1237-5p	5	97	0.53142	10.7907	4.34379	Up	9.72598e-23	1.04524e-21
hsa-miR-3678-3p	1	19	0.106284	2.11364	4.31374	Up	2.95954e-05	0.000109347
hsa-miR-4533	2	38	0.212568	4.22729	4.31374	Up	1.52974e-09	8.88348e-09
hsa-miR-891a-3p	4	75	0.425136	8.34333	4.29463	Up	1.01104e-17	9.12404e-17
hsa-miR-4488	4	73	0.425136	8.12084	4.25563	Up	3.5234e-17	3.10395e-16
hsa-miR-4726-3p	7	127	0.743988	14.128	4.24714	Up	5.95454e-29	7.67277e-28
hsa-miR-770-5p	3	54	0.318852	6.0072	4.23573	Up	5.77838e-13	4.08907e-12
hsa-miR-4467	1	18	0.106284	2.0024	4.23573	Up	5.54948e-05	0.00019582
hsa-miR-646	1	18	0.106284	2.0024	4.23573	Up	5.54948e-05	0.000195553
hsa-miR-6802-3p	1	18	0.106284	2.0024	4.23573	Up	5.54948e-05	0.000195287
hsa-miR-8064	1	18	0.106284	2.0024	4.23573	Up	5.54948e-05	0.000195022
hsa-miR-4449	25	449	2.6571	49.9487	4.23252	Up	1.28861e-98	4.63542e-97
hsa-miR-6126	31	540	3.2948	60.072	4.18843	Up	2.15348e-117	8.99599e-116
hsa-miR-6801-3p	3	52	0.318852	5.78471	4.18129	Up	2.00708e-12	1.35373e-11
hsa-miR-1180-5p	9	156	0.956556	17.3541	4.18129	Up	6.91132e-35	1.02288e-33
hsa-miR-4715-3p	1	17	0.106284	1.89115	4.15327	Up	0.000103824	0.000348323
hsa-miR-564	1	17	0.106284	1.89115	4.15327	Up	0.000103824	0.000347872
hsa-miR-4756-5p	1	17	0.106284	1.89115	4.15327	Up	0.000103824	0.000347423
hsa-miR-3180-5p	2	34	0.212568	3.78231	4.15327	Up	1.86021e-08	9.83256e-08
hsa-miR-4283	1	17	0.106284	1.89115	4.15327	Up	0.000103824	0.000346974
hsa-miR-4470	1	17	0.106284	1.89115	4.15327	Up	0.000103824	0.000346527
hsa-miR-6737-3p	1	17	0.106284	1.89115	4.15327	Up	0.000103824	0.000346081
hsa-miR-4695-3p	25	413	2.6571	45.9439	4.11195	Up	6.14428e-89	2.09391e-87
hsa-miR-1247-5p	11	179	1.16912	19.9127	4.09019	Up	3.2905e-39	5.46307e-38
hsa-miR-6821-5p	4	65	0.425136	7.23089	4.08818	Up	5.05312e-15	4.02695e-14
hsa-miR-6836-3p	21	338	2.23196	37.6006	4.07437	Up	1.45295e-72	4.09038e-71
hsa-miR-548aw	63	1011	6.69589	112.468	4.0701	Up	1.05498e-213	7.00612e-212
hsa-miR-6749-5p	3	48	0.318852	5.33973	4.06581	Up	2.39324e-11	1.52297e-10
hsa-miR-548as-5p	4	64	0.425136	7.11964	4.06581	Up	9.36746e-15	7.32983e-14
hsa-miR-4743-3p	1	16	0.106284	1.77991	4.06581	Up	0.00019376	0.000609026
hsa-miR-7154-3p	1	16	0.106284	1.77991	4.06581	Up	0.00019376	0.000608288
hsa-miR-8081	1	16	0.106284	1.77991	4.06581	Up	0.00019376	0.000607551
hsa-miR-8087	1	16	0.106284	1.77991	4.06581	Up	0.00019376	0.000606817
hsa-miR-4441	1	16	0.106284	1.77991	4.06581	Up	0.00019376	0.000606084
hsa-miR-4500	1	16	0.106284	1.77991	4.06581	Up	0.00019376	0.000605353
hsa-miR-6769b-5p	1	16	0.106284	1.77991	4.06581	Up	0.00019376	0.000604623
hsa-miR-3178	13	205	1.38169	22.8051	4.04485	Up	2.44392e-44	4.45757e-43
hsa-miR-149-3p	2	31	0.212568	3.44858	4.02	Up	1.19374e-07	5.82258e-07
hsa-miR-7109-5p	8	123	0.850272	13.6831	4.00832	Up	5.85008e-27	7.04731e-26
hsa-miR-6793-5p	11	166	1.16912	18.4666	3.98142	Up	9.65654e-36	1.4541e-34
hsa-miR-1228-5p	3	45	0.318852	5.006	3.9727	Up	1.51819e-10	9.36218e-10
hsa-miR-640	3	44	0.318852	4.89475	3.94028	Up	2.80364e-10	1.7126e-09
hsa-miR-4516	25	366	2.6571	40.7155	3.93765	Up	2.02272e-76	5.95323e-75
hsa-miR-6805-3p	8	117	0.850272	13.0156	3.93617	Up	2.29976e-25	2.64728e-24
hsa-miR-5588-5p	2	29	0.212568	3.22609	3.92379	Up	4.08862e-07	1.88091e-06
hsa-miR-3928-5p	35	505	3.71994	56.1784	3.91666	Up	2.08692e-104	7.7216e-103
hsa-miR-874-5p	3	43	0.318852	4.78351	3.90711	Up	5.17078e-10	3.13637e-09
hsa-miR-1469	32	450	3.40109	50.06	3.87959	Up	1.67429e-92	5.86001e-91
hsa-miR-6743-5p	4	56	0.425136	6.22969	3.87316	Up	1.26435e-12	8.68612e-12
hsa-miR-7848-3p	5	70	0.53142	7.78711	3.87316	Up	1.72772e-15	1.4116e-14
hsa-miR-4281	26	359	2.76338	39.9367	3.85321	Up	1.04944e-73	2.98688e-72
hsa-miR-663b	10	138	1.06284	15.3517	3.8524	Up	3.3704e-29	4.36467e-28
hsa-miR-323a-5p	18	247	1.91311	27.4774	3.84425	Up	4.42212e-51	9.01834e-50
hsa-miR-6729-5p	7	96	0.743988	10.6795	3.84342	Up	1.14301e-20	1.12562e-19
hsa-miR-6822-5p	3	41	0.318852	4.56102	3.8384	Up	1.75162e-09	1.00815e-08
hsa-miR-4640-5p	5	68	0.53142	7.56462	3.83134	Up	5.82478e-15	4.62766e-14
hsa-miR-6794-5p	2	27	0.212568	3.0036	3.8207	Up	1.38987e-06	6.02975e-06
hsa-miR-4774-3p	2	27	0.212568	3.0036	3.8207	Up	1.38987e-06	6.01966e-06
hsa-miR-3165	2	27	0.212568	3.0036	3.8207	Up	1.38987e-06	6.00961e-06
hsa-miR-7856-5p	2	27	0.212568	3.0036	3.8207	Up	1.38987e-06	5.9996e-06
hsa-miR-5189-3p	5	67	0.53142	7.45338	3.80997	Up	1.06802e-14	8.33187e-14
hsa-miR-718	265	3522	28.1653	391.803	3.79814	Up	0	0
hsa-miR-4788	27	353	2.86967	39.2693	3.77444	Up	2.75244e-71	7.6654e-70
hsa-miR-4532	4	52	0.425136	5.78471	3.76625	Up	1.4325e-11	9.20638e-11
hsa-miR-1292-3p	5	65	0.53142	7.23089	3.76625	Up	3.58032e-14	2.71141e-13
hsa-miR-4448	23	298	2.44453	33.1508	3.76141	Up	3.0362e-60	6.95908e-59
hsa-miR-7973	5	64	0.53142	7.11964	3.74388	Up	6.5454e-14	4.91379e-13
hsa-miR-4302	10	128	1.06284	14.2393	3.74388	Up	1.41482e-26	1.68091e-25
hsa-miR-6088	3	38	0.318852	4.22729	3.72877	Up	1.07993e-08	5.80294e-08
hsa-miR-8060	2	25	0.212568	2.78111	3.70966	Up	4.68446e-06	1.89278e-05
hsa-miR-298	2	25	0.212568	2.78111	3.70966	Up	4.68446e-06	1.88984e-05
hsa-miR-572	7	87	0.743988	9.67826	3.7014	Up	2.60856e-18	2.38734e-17
hsa-miR-4453	5	62	0.53142	6.89715	3.69808	Up	2.18068e-13	1.57764e-12
hsa-miR-4492	5	62	0.53142	6.89715	3.69808	Up	2.18068e-13	1.57325e-12
hsa-miR-6790-5p	9	110	0.956556	12.2369	3.67724	Up	1.07596e-22	1.15154e-21
hsa-miR-3660	5	61	0.53142	6.78591	3.67462	Up	3.9738e-13	2.82751e-12
hsa-miR-639	27	327	2.86967	36.3769	3.66407	Up	1.60762e-64	4.04246e-63
hsa-miR-4465	22	266	2.33825	29.591	3.66166	Up	9.78314e-53	2.01098e-51
hsa-miR-6127	12	143	1.27541	15.908	3.64072	Up	7.24192e-29	9.23969e-28
hsa-miR-599	3	35	0.318852	3.89355	3.61013	Up	6.55754e-08	3.30429e-07
hsa-miR-6850-3p	3	35	0.318852	3.89355	3.61013	Up	6.55754e-08	3.29787e-07
hsa-miR-1199-5p	6	69	0.637704	7.67586	3.58937	Up	2.00442e-14	1.5314e-13
hsa-miR-6729-3p	4	46	0.425136	5.11724	3.58937	Up	5.25726e-10	3.18138e-09
hsa-miR-661	2	23	0.212568	2.55862	3.58937	Up	1.56349e-05	5.95507e-05
hsa-miR-6726-5p	2	23	0.212568	2.55862	3.58937	Up	1.56349e-05	5.94633e-05
hsa-miR-4313	2	23	0.212568	2.55862	3.58937	Up	1.56349e-05	5.93761e-05
hsa-miR-8074	2	23	0.212568	2.55862	3.58937	Up	1.56349e-05	5.92892e-05
hsa-miR-4696	16	183	1.70054	20.3577	3.58151	Up	4.75736e-36	7.24798e-35
hsa-miR-378g	12	137	1.27541	15.2405	3.57888	Up	2.5623e-27	3.13036e-26
hsa-miR-5787	8	91	0.850272	10.1232	3.5736	Up	1.46066e-18	1.34631e-17
hsa-miR-3168	16	181	1.70054	20.1352	3.56565	Up	1.55457e-35	2.32736e-34
hsa-miR-133b	22	247	2.33825	27.4774	3.55474	Up	7.74082e-48	1.49617e-46
hsa-miR-6797-5p	5	56	0.53142	6.22969	3.55123	Up	7.84374e-12	5.13012e-11
hsa-miR-4745-3p	30	335	3.18852	37.2669	3.54693	Up	3.2246e-64	8.03049e-63
hsa-miR-422a	42	465	4.46393	51.7286	3.53458	Up	2.99686e-88	1.00803e-86
hsa-miR-6790-3p	16	177	1.70054	19.6903	3.53341	Up	1.65123e-34	2.40263e-33
hsa-miR-6888-3p	2	22	0.212568	2.44738	3.52524	Up	2.8446e-05	0.000105401
hsa-miR-7108-3p	3	33	0.318852	3.67107	3.52524	Up	2.16168e-07	1.02918e-06
hsa-miR-4723-5p	2	22	0.212568	2.44738	3.52524	Up	2.8446e-05	0.00010525
hsa-miR-512-5p	7	77	0.743988	8.56582	3.52524	Up	1.00724e-15	8.30811e-15
hsa-miR-3960	20	219	2.12568	24.3625	3.51867	Up	3.34612e-42	5.81641e-41
hsa-miR-208a-5p	40	436	4.25136	48.5026	3.51206	Up	2.26434e-82	7.152e-81
hsa-miR-1237-3p	107	1162	11.3724	129.266	3.50674	Up	2.06234e-216	1.40565e-214
hsa-miR-4466	23	249	2.44453	27.6999	3.50225	Up	1.38944e-47	2.64607e-46
hsa-miR-4783-5p	10	108	1.06284	12.0144	3.49877	Up	2.09824e-21	2.13954e-20
hsa-miR-183-3p	11	118	1.16912	13.1268	3.48902	Up	3.2937e-23	3.56932e-22
hsa-miR-8075	7	75	0.743988	8.34333	3.48727	Up	3.27732e-15	2.65258e-14
hsa-miR-6879-5p	10	106	1.06284	11.7919	3.4718	Up	6.79968e-21	6.82604e-20
hsa-miR-557	5	53	0.53142	5.89595	3.4718	Up	4.6227e-11	2.90602e-10
hsa-miR-338-5p	2	21	0.212568	2.33613	3.45813	Up	5.15972e-05	0.000184073
hsa-miR-6892-5p	2	21	0.212568	2.33613	3.45813	Up	5.15972e-05	0.000183819
hsa-miR-6781-5p	2	21	0.212568	2.33613	3.45813	Up	5.15972e-05	0.000183567
hsa-miR-3622a-3p	6	63	0.637704	7.0084	3.45813	Up	6.96406e-13	4.88805e-12
hsa-miR-4783-3p	3	31	0.318852	3.44858	3.43504	Up	7.06426e-07	3.17646e-06
hsa-miR-4754	6	62	0.637704	6.89715	3.43504	Up	1.25266e-12	8.62867e-12
hsa-miR-1273g-5p	3	31	0.318852	3.44858	3.43504	Up	7.06426e-07	3.17096e-06
hsa-miR-638	9	92	0.956556	10.2345	3.41945	Up	4.5426e-18	4.12819e-17
hsa-miR-181d-3p	16	163	1.70054	18.1328	3.41454	Up	6.07716e-31	8.41703e-30
hsa-miR-504-5p	11	112	1.16912	12.4594	3.41373	Up	1.1068e-21	1.14665e-20
hsa-miR-1908-3p	16	162	1.70054	18.0216	3.40566	Up	1.08833e-30	1.48357e-29
hsa-miR-6869-5p	16	162	1.70054	18.0216	3.40566	Up	1.08833e-30	1.4758e-29
hsa-miR-3656	8	81	0.850272	9.0108	3.40566	Up	5.26254e-16	4.48355e-15
hsa-miR-3186-5p	20	201	2.12568	22.3601	3.39493	Up	1.25699e-37	1.9731e-36
hsa-miR-548az-3p	3	30	0.318852	3.33733	3.38774	Up	1.27249e-06	5.58603e-06
hsa-miR-6881-3p	2	20	0.212568	2.22489	3.38774	Up	9.32822e-05	0.000319578
hsa-miR-1233-5p	2	20	0.212568	2.22489	3.38774	Up	9.32822e-05	0.000319156
hsa-miR-4655-5p	2	20	0.212568	2.22489	3.38774	Up	9.32822e-05	0.000318735
hsa-miR-1203	2	20	0.212568	2.22489	3.38774	Up	9.32822e-05	0.000318315
hsa-miR-7843-3p	2	20	0.212568	2.22489	3.38774	Up	9.32822e-05	0.000317896
hsa-miR-6746-3p	2	20	0.212568	2.22489	3.38774	Up	9.32822e-05	0.000317478
hsa-miR-4733-3p	2	20	0.212568	2.22489	3.38774	Up	9.32822e-05	0.000317062
hsa-miR-4712-5p	15	150	1.59426	16.6867	3.38774	Up	2.19596e-28	2.78801e-27
hsa-miR-4707-5p	18	177	1.91311	19.6903	3.36349	Up	5.0338e-33	7.24308e-32
hsa-miR-4292	13	127	1.38169	14.128	3.35405	Up	5.01174e-24	5.57099e-23
hsa-miR-6804-3p	15	146	1.59426	16.2417	3.34874	Up	2.23678e-27	2.7587e-26
hsa-miR-6748-3p	44	428	4.6765	47.6126	3.34784	Up	2.20952e-77	6.57777e-76
hsa-miR-6720-5p	3	29	0.318852	3.22609	3.33883	Up	2.28628e-06	9.65981e-06
hsa-miR-6836-5p	122	1172	12.9667	130.378	3.32983	Up	7.52756e-208	4.8741e-206
hsa-miR-6511a-3p	5	48	0.53142	5.33973	3.32884	Up	8.62402e-10	5.11126e-09
hsa-miR-6786-5p	5	48	0.53142	5.33973	3.32884	Up	8.62402e-10	5.09959e-09
hsa-miR-4755-5p	7	67	0.743988	7.45338	3.32454	Up	3.5128e-13	2.5133e-12
hsa-miR-202-3p	20	190	2.12568	21.1364	3.31374	Up	7.3328e-35	1.07909e-33
hsa-miR-6855-5p	2	19	0.212568	2.11364	3.31374	Up	0.000168042	0.000536658
hsa-miR-4632-3p	4	38	0.425136	4.22729	3.31374	Up	5.85788e-08	2.95749e-07
hsa-miR-663a	28	266	2.97595	29.591	3.31374	Up	3.24246e-48	6.3621e-47
hsa-miR-5192	7	66	0.743988	7.34213	3.30285	Up	6.26644e-13	4.42237e-12
hsa-miR-6727-5p	7	66	0.743988	7.34213	3.30285	Up	6.26644e-13	4.41035e-12
hsa-miR-5096	5	47	0.53142	5.22849	3.29847	Up	1.54057e-09	8.92636e-09
hsa-miR-6789-5p	23	213	2.44453	23.6951	3.27696	Up	1.69055e-38	2.73657e-37
hsa-miR-345-3p	4	37	0.425136	4.11604	3.27526	Up	1.0465e-07	5.14316e-07
hsa-miR-1181	10	92	1.06284	10.2345	3.26744	Up	2.32486e-17	2.06212e-16
hsa-miR-4787-5p	7	64	0.743988	7.11964	3.25845	Up	1.98606e-12	1.34305e-11
hsa-miR-3190-5p	201	1821	21.3631	202.576	3.24527	Up	0	0
hsa-miR-6814-3p	6	54	0.637704	6.0072	3.23573	Up	1.30496e-10	8.10517e-10
hsa-miR-6510-5p	4	36	0.425136	4.0048	3.23573	Up	1.86528e-07	8.92991e-07
hsa-miR-7152-5p	2	18	0.212568	2.0024	3.23573	Up	0.00030154	0.000915579
hsa-miR-4701-5p	3	27	0.318852	3.0036	3.23573	Up	7.31916e-06	2.89857e-05
hsa-miR-3973	2	18	0.212568	2.0024	3.23573	Up	0.00030154	0.000914507
hsa-miR-4433b-3p	3	27	0.318852	3.0036	3.23573	Up	7.31916e-06	2.89414e-05
hsa-miR-4475	3	27	0.318852	3.0036	3.23573	Up	7.31916e-06	2.88973e-05
hsa-miR-6732-5p	2	18	0.212568	2.0024	3.23573	Up	0.00030154	0.000913437
hsa-miR-296-5p	37	331	3.93251	36.8219	3.22704	Up	4.0673e-58	8.92738e-57
hsa-miR-4750-5p	9	80	0.956556	8.89955	3.21781	Up	4.6942e-15	3.76408e-14
hsa-miR-4513	8	71	0.850272	7.89835	3.21556	Up	1.70772e-13	1.24943e-12
hsa-miR-6724-5p	681	6040	72.3794	671.916	3.21463	Up	0	0
hsa-miR-4694-3p	7	62	0.743988	6.89715	3.21265	Up	6.2589e-12	4.13534e-11
hsa-miR-3196	7	62	0.743988	6.89715	3.21265	Up	6.2589e-12	4.12482e-11
hsa-miR-762	26	229	2.76338	25.475	3.20457	Up	2.10368e-40	3.56113e-39
hsa-miR-5007-5p	5	44	0.53142	4.89475	3.20331	Up	8.68358e-09	4.70512e-08
hsa-miR-6892-3p	20	174	2.12568	19.3565	3.18682	Up	6.94864e-31	9.52221e-30
hsa-miR-4261	6	52	0.637704	5.78471	3.18129	Up	4.10378e-10	2.49502e-09
hsa-miR-548ag	3	26	0.318852	2.89235	3.18129	Up	1.30365e-05	5.03196e-05
hsa-miR-1182	3	26	0.318852	2.89235	3.18129	Up	1.30365e-05	5.02448e-05
hsa-miR-7975	7	60	0.743988	6.67466	3.16534	Up	1.96063e-11	1.25383e-10
hsa-miR-378i	4	34	0.425136	3.78231	3.15327	Up	5.88246e-07	2.66356e-06
hsa-miR-4529-3p	14	119	1.48798	13.2381	3.15327	Up	2.39776e-21	2.43537e-20
hsa-miR-5008-3p	13	110	1.38169	12.2369	3.14673	Up	8.53848e-20	8.22106e-19
hsa-miR-20b-5p	10	84	1.06284	9.34453	3.1362	Up	2.23172e-15	1.81766e-14
hsa-miR-892a	5	42	0.53142	4.67227	3.1362	Up	2.72244e-08	1.43025e-07
hsa-miR-3621	8	67	0.850272	7.45338	3.1319	Up	1.66554e-12	1.13519e-11
hsa-miR-6735-3p	8	67	0.850272	7.45338	3.1319	Up	1.66554e-12	1.13221e-11
hsa-miR-6076	3	25	0.318852	2.78111	3.1247	Up	2.31438e-05	8.6497e-05
hsa-miR-1245b-3p	3	25	0.318852	2.78111	3.1247	Up	2.31438e-05	8.63724e-05
hsa-miR-1285-5p	4	33	0.425136	3.67107	3.1102	Up	1.04054e-06	4.60684e-06
hsa-miR-497-5p	16	131	1.70054	14.573	3.09923	Up	5.63078e-23	6.07655e-22
hsa-miR-4457	61	499	6.48333	55.511	3.09797	Up	2.6421e-83	8.4482e-82
hsa-miR-7976	6	49	0.637704	5.45098	3.09556	Up	2.25754e-09	1.29359e-08
hsa-miR-4687-5p	1564	12750	166.228	1418.37	3.09299	Up	0	0
hsa-miR-431-3p	51	415	5.42049	46.1664	3.09035	Up	2.20688e-69	5.8926e-68
hsa-miR-7107-5p	15	122	1.59426	13.5718	3.08965	Up	1.99167e-21	2.0389e-20
hsa-miR-1343-5p	17	138	1.80683	15.3517	3.08687	Up	4.90518e-24	5.47604e-23
hsa-miR-6771-3p	10	81	1.06284	9.0108	3.08373	Up	1.21271e-14	9.37586e-14
hsa-miR-4297	20	162	2.12568	18.0216	3.08373	Up	6.06698e-28	7.6279e-27
hsa-miR-6785-5p	11	89	1.16912	9.90075	3.08211	Up	5.92524e-16	4.98259e-15
hsa-miR-6090	20	161	2.12568	17.9103	3.0748	Up	1.06239e-27	1.32927e-26
hsa-miR-3687	62	497	6.58961	55.2885	3.06871	Up	3.60028e-82	1.11009e-80
hsa-miR-3692-3p	4	32	0.425136	3.55982	3.06581	Up	1.83545e-06	7.83164e-06
hsa-miR-6757-5p	4	32	0.425136	3.55982	3.06581	Up	1.83545e-06	7.81876e-06
hsa-miR-6132	6	48	0.637704	5.33973	3.06581	Up	3.9697e-09	2.22544e-08
hsa-miR-627-3p	3	24	0.318852	2.66987	3.06581	Up	4.09432e-05	0.000148728
hsa-miR-1915-5p	3	24	0.318852	2.66987	3.06581	Up	4.09432e-05	0.000148519
hsa-miR-138-5p	3	24	0.318852	2.66987	3.06581	Up	4.09432e-05	0.000148312
hsa-miR-4252	3	24	0.318852	2.66987	3.06581	Up	4.09432e-05	0.000148105
hsa-miR-1200	6	48	0.637704	5.33973	3.06581	Up	3.9697e-09	2.22063e-08
hsa-miR-501-5p	3	24	0.318852	2.66987	3.06581	Up	4.09432e-05	0.000147898
hsa-miR-1972	3	24	0.318852	2.66987	3.06581	Up	4.09432e-05	0.000147692
hsa-miR-1178-5p	3	24	0.318852	2.66987	3.06581	Up	4.09432e-05	0.000147487
hsa-miR-4327	5	40	0.53142	4.44978	3.06581	Up	8.45918e-08	4.19718e-07
hsa-miR-3191-3p	235	1872	24.9767	208.25	3.05966	Up	1.2e-303	1.036e-301
hsa-miR-4651	57	454	6.05819	50.505	3.05947	Up	5.71434e-75	1.64446e-73
hsa-miR-611	90	706	9.56556	78.5386	3.03748	Up	8.93946e-115	3.67511e-113
hsa-miR-4664-3p	86	671	9.14043	74.645	3.02971	Up	7.06132e-109	2.72967e-107
hsa-miR-6738-5p	5	39	0.53142	4.33853	3.02928	Up	1.48576e-07	7.19273e-07
hsa-miR-499b-5p	5	39	0.53142	4.33853	3.02928	Up	1.48576e-07	7.17932e-07
hsa-miR-4419b	126	981	13.3918	109.131	3.02664	Up	3.42382e-158	2.01538e-156
hsa-miR-6774-5p	4	31	0.425136	3.44858	3.02	Up	3.22804e-06	1.33343e-05
hsa-miR-1234-3p	4	31	0.425136	3.44858	3.02	Up	3.22804e-06	1.33131e-05
hsa-miR-3615	34	262	3.61366	29.146	3.01177	Up	3.1352e-43	5.60012e-42
hsa-miR-141-3p	27	208	2.86967	23.1388	3.01136	Up	1.26289e-34	1.84795e-33
hsa-miR-7158-3p	9	69	0.956556	7.67586	3.00441	Up	2.3423e-12	1.56759e-11
hsa-miR-885-3p	3	23	0.318852	2.55862	3.00441	Up	7.216e-05	0.000249525
hsa-miR-637	3	23	0.318852	2.55862	3.00441	Up	7.216e-05	0.000249193
hsa-miR-600	3	23	0.318852	2.55862	3.00441	Up	7.216e-05	0.000248861
hsa-miR-4758-5p	3	23	0.318852	2.55862	3.00441	Up	7.216e-05	0.00024853
hsa-miR-3651	143	1093	15.1986	121.59	3.00001	Up	2.14274e-174	1.29063e-172
hsa-miR-500a-5p	38	290	4.03879	32.2609	2.99779	Up	1.86397e-47	3.52386e-46
hsa-miR-34c-3p	8	61	0.850272	6.78591	2.99655	Up	4.84978e-11	3.04139e-10
hsa-miR-4730	34	254	3.61366	28.2561	2.96703	Up	2.60688e-41	4.4714e-40
hsa-miR-1231	9	67	0.956556	7.45338	2.96197	Up	7.11364e-12	4.66439e-11
hsa-miR-8485	8	59	0.850272	6.56342	2.94845	Up	1.47215e-10	9.09995e-10
hsa-miR-548as-3p	14	103	1.48798	11.4582	2.94495	Up	1.83489e-17	1.63874e-16
hsa-miR-6078	33	242	3.50737	26.9211	2.94028	Up	4.65418e-39	7.67791e-38
hsa-miR-6770-3p	3	22	0.318852	2.44738	2.94028	Up	0.000126664	0.000413696
hsa-miR-1252-3p	3	22	0.318852	2.44738	2.94028	Up	0.000126664	0.000413175
hsa-miR-499a-3p	6	44	0.637704	4.89475	2.94028	Up	3.7144e-08	1.92406e-07
hsa-miR-302b-3p	3	22	0.318852	2.44738	2.94028	Up	0.000126664	0.000412655
hsa-miR-4731-5p	3	22	0.318852	2.44738	2.94028	Up	0.000126664	0.000412137
hsa-miR-4717-3p	6	44	0.637704	4.89475	2.94028	Up	3.7144e-08	1.92022e-07
hsa-miR-4254	6	44	0.637704	4.89475	2.94028	Up	3.7144e-08	1.91639e-07
hsa-miR-4444	7	51	0.743988	5.67346	2.93088	Up	3.06898e-09	1.73931e-08
hsa-miR-875-3p	15	109	1.59426	12.1256	2.9271	Up	2.73078e-18	2.49039e-17
hsa-miR-4688	4	29	0.425136	3.22609	2.92379	Up	9.88974e-06	3.85179e-05
hsa-miR-6845-5p	4	29	0.425136	3.22609	2.92379	Up	9.88974e-06	3.84601e-05
hsa-miR-203a-3p	4	29	0.425136	3.22609	2.92379	Up	9.88974e-06	3.84024e-05
hsa-miR-6847-3p	9	65	0.956556	7.23089	2.91825	Up	2.1464e-11	1.36926e-10
hsa-miR-5684	18	130	1.91311	14.4618	2.91825	Up	1.74589e-21	1.80154e-20
hsa-miR-6722-3p	52	375	5.52677	41.7167	2.91612	Up	3.82488e-59	8.46704e-58
hsa-miR-187-5p	16	115	1.70054	12.7931	2.9113	Up	4.0638e-19	3.84133e-18
hsa-miR-29b-1-5p	42	300	4.46393	33.3733	2.90231	Up	2.16396e-47	4.06135e-46
hsa-miR-3136-3p	33	234	3.50737	26.0312	2.89178	Up	3.69212e-37	5.7261e-36
hsa-miR-3672	11	78	1.16912	8.67706	2.89178	Up	2.65538e-13	1.90511e-12
hsa-miR-6087	23	161	2.44453	17.9103	2.87316	Up	7.5306e-26	8.7857e-25
hsa-miR-4638-5p	3	21	0.318852	2.33613	2.87316	Up	0.000221372	0.000689956
hsa-miR-4267	3	21	0.318852	2.33613	2.87316	Up	0.000221372	0.000689127
hsa-miR-498	3	21	0.318852	2.33613	2.87316	Up	0.000221372	0.000688299
hsa-miR-6838-3p	3	21	0.318852	2.33613	2.87316	Up	0.000221372	0.000687474
hsa-miR-550a-3p	3	21	0.318852	2.33613	2.87316	Up	0.000221372	0.000686651
hsa-miR-4430	5	35	0.53142	3.89355	2.87316	Up	1.37666e-06	5.99252e-06
hsa-miR-6794-3p	5	35	0.53142	3.89355	2.87316	Up	1.37666e-06	5.98247e-06
hsa-miR-1228-3p	14	98	1.48798	10.902	2.87316	Up	2.84218e-16	2.4375e-15
hsa-miR-3663-5p	7	49	0.743988	5.45098	2.87316	Up	9.2308e-09	4.98079e-08
hsa-miR-7160-5p	6	42	0.637704	4.67227	2.87316	Up	1.12023e-07	5.47435e-07
hsa-miR-449b-3p	85	593	9.03414	65.9679	2.86831	Up	6.60954e-91	2.28249e-89
hsa-miR-4633-5p	105	727	11.1598	80.8747	2.85737	Up	1.37268e-110	5.38671e-109
hsa-miR-3174	30	207	3.18852	23.0276	2.8524	Up	1.44582e-32	2.04626e-31
hsa-miR-3195	91	626	9.67185	69.639	2.84803	Up	4.03014e-95	1.42987e-93
hsa-miR-4731-3p	8	55	0.850272	6.11844	2.84717	Up	1.32614e-09	7.73579e-09
hsa-miR-378h	45	309	4.78278	34.3745	2.84542	Up	9.8183e-48	1.88366e-46
hsa-miR-8069	14	96	1.48798	10.6795	2.84342	Up	8.43474e-16	7.02443e-15
hsa-miR-6512-5p	14	96	1.48798	10.6795	2.84342	Up	8.43474e-16	7.00192e-15
hsa-miR-4479	6	41	0.637704	4.56102	2.8384	Up	1.93791e-07	9.26049e-07
hsa-miR-4270	5	34	0.53142	3.78231	2.83134	Up	2.3843e-06	9.94418e-06
hsa-miR-6089	59	400	6.27076	44.4978	2.82702	Up	6.93332e-61	1.61777e-59
hsa-miR-6813-3p	4	27	0.425136	3.0036	2.8207	Up	2.9877e-05	0.00011023
hsa-miR-7156-3p	4	27	0.425136	3.0036	2.8207	Up	2.9877e-05	0.000110073
hsa-miR-571	7	47	0.743988	5.22849	2.81304	Up	2.75114e-08	1.4424e-07
hsa-miR-4277	44	295	4.6765	32.8171	2.81095	Up	4.86774e-45	8.94145e-44
hsa-miR-1233-3p	13	87	1.38169	9.67826	2.80831	Up	2.9139e-14	2.2132e-13
hsa-miR-4634	37	247	3.93251	27.4774	2.80472	Up	7.18342e-38	1.13445e-36
hsa-miR-4709-3p	6	40	0.637704	4.44978	2.80277	Up	3.34328e-07	1.55181e-06
hsa-miR-4786-3p	9	60	0.956556	6.67466	2.80277	Up	3.29076e-10	2.00543e-09
hsa-miR-4655-3p	136	905	14.4546	100.676	2.80012	Up	3.7612e-134	1.80398e-132
hsa-miR-3181	23	153	2.44453	17.0204	2.79963	Up	5.6928e-24	6.30101e-23
hsa-miR-5195-3p	49	325	5.20792	36.1544	2.79539	Up	3.70626e-49	7.38401e-48
hsa-miR-606	8	53	0.850272	5.89595	2.79373	Up	3.93156e-09	2.20884e-08
hsa-miR-7704	32	212	3.40109	23.5838	2.79373	Up	1.40606e-32	2.00093e-31
hsa-miR-6741-3p	5	33	0.53142	3.67107	2.78827	Up	4.11616e-06	1.6736e-05
hsa-miR-6852-5p	41	270	4.35764	30.036	2.78507	Up	6.16942e-41	1.05124e-39
hsa-miR-4463	14	92	1.48798	10.2345	2.78202	Up	7.3166e-15	5.79511e-14
hsa-miR-6734-3p	7	46	0.743988	5.11724	2.78202	Up	4.73226e-08	2.42704e-07
hsa-miR-3620-3p	24	157	2.55082	17.4654	2.77547	Up	2.47152e-24	2.78315e-23
hsa-miR-6880-5p	15	98	1.59426	10.902	2.77363	Up	1.07314e-15	8.82361e-15
hsa-miR-4771	4	26	0.425136	2.89235	2.76625	Up	5.16286e-05	0.000183427
hsa-miR-6769a-3p	4	26	0.425136	2.89235	2.76625	Up	5.16286e-05	0.000183175
hsa-miR-6079	18	117	1.91311	13.0156	2.76625	Up	2.00048e-18	1.83732e-17
hsa-miR-4429	22	143	2.33825	15.908	2.76625	Up	3.27604e-22	3.44916e-21
hsa-miR-6840-5p	128	827	13.6044	91.9991	2.75755	Up	1.25945e-120	5.43661e-119
hsa-miR-5009-3p	9	58	0.956556	6.45218	2.75386	Up	9.67534e-10	5.70823e-09
hsa-miR-5100	27	174	2.86967	19.3565	2.75386	Up	1.38162e-26	1.64903e-25
hsa-miR-3622b-3p	7	45	0.743988	5.006	2.75031	Up	8.11922e-08	4.03623e-07
hsa-miR-3194-5p	6	38	0.637704	4.22729	2.72877	Up	9.86448e-07	4.37483e-06
hsa-miR-5001-5p	26	164	2.76338	18.2441	2.72292	Up	7.8076e-25	8.94765e-24
hsa-miR-506-5p	7	44	0.743988	4.89475	2.71788	Up	1.38934e-07	6.73857e-07
hsa-miR-6820-3p	157	982	16.6866	109.242	2.71077	Up	4.19028e-140	2.08708e-138
hsa-miR-6854-5p	13	81	1.38169	9.0108	2.70522	Up	7.24666e-13	5.07266e-12
hsa-miR-6862-3p	14	87	1.48798	9.67826	2.7014	Up	1.05636e-13	7.86197e-13
hsa-miR-6876-3p	20	124	2.12568	13.7943	2.69808	Up	6.21086e-19	5.8495e-18
hsa-miR-4284	30	186	3.18852	20.6915	2.69808	Up	1.09137e-27	1.35897e-26
hsa-miR-509-3p	17	105	1.80683	11.6807	2.69259	Up	3.31242e-16	2.83141e-15
hsa-miR-4712-3p	24	148	2.55082	16.4642	2.6903	Up	2.95302e-22	3.12176e-21
hsa-miR-6874-5p	7	43	0.743988	4.78351	2.68472	Up	2.37086e-07	1.12258e-06
hsa-miR-6796-3p	7	43	0.743988	4.78351	2.68472	Up	2.37086e-07	1.12053e-06
hsa-miR-4668-5p	72	438	7.65245	48.7251	2.67067	Up	2.27614e-62	5.50954e-61
hsa-miR-8063	13	79	1.38169	8.78831	2.66915	Up	2.0892e-12	1.40546e-11
hsa-miR-924	15	91	1.59426	10.1232	2.66671	Up	4.43984e-14	3.35253e-13
hsa-miR-8083	31	187	3.2948	20.8027	2.65851	Up	2.24664e-27	2.75772e-26
hsa-miR-92a-1-5p	21	126	2.23196	14.0168	2.65077	Up	7.51864e-19	7.03006e-18
hsa-miR-7703	21	126	2.23196	14.0168	2.65077	Up	7.51864e-19	7.00478e-18
hsa-miR-6856-3p	5	30	0.53142	3.33733	2.65077	Up	2.07346e-05	7.80561e-05
hsa-miR-873-5p	5	30	0.53142	3.33733	2.65077	Up	2.07346e-05	7.79428e-05
hsa-miR-4707-3p	5	30	0.53142	3.33733	2.65077	Up	2.07346e-05	7.78299e-05
hsa-miR-3200-5p	5	30	0.53142	3.33733	2.65077	Up	2.07346e-05	7.77172e-05
hsa-miR-5585-5p	9	54	0.956556	6.0072	2.65077	Up	8.1507e-09	4.46307e-08
hsa-miR-6504-5p	4	24	0.425136	2.66987	2.65077	Up	0.00015219	0.000489047
hsa-miR-3713	4	24	0.425136	2.66987	2.65077	Up	0.00015219	0.000488441
hsa-miR-3929	4	24	0.425136	2.66987	2.65077	Up	0.00015219	0.000487837
hsa-miR-1538	6	36	0.637704	4.0048	2.65077	Up	2.87446e-06	1.19118e-05
hsa-miR-615-5p	169	1010	17.962	112.357	2.64507	Up	5.79958e-140	2.83413e-138
hsa-miR-628-3p	19	113	2.0194	12.5706	2.63806	Up	5.85818e-17	5.10865e-16
hsa-miR-378a-5p	290	1724	30.8224	191.785	2.63744	Up	9.2734e-237	6.6717e-235
hsa-miR-6765-3p	28	164	2.97595	18.2441	2.61601	Up	9.36018e-24	1.03161e-22
hsa-miR-508-5p	14	82	1.48798	9.12204	2.61601	Up	1.46922e-12	1.00403e-11
hsa-miR-4454	48	281	5.10163	31.2597	2.61527	Up	1.27044e-39	2.13665e-38
hsa-miR-208b-3p	73	427	7.75873	47.5014	2.61408	Up	2.39944e-59	5.35737e-58
hsa-miR-885-5p	6	35	0.637704	3.89355	2.61013	Up	4.88208e-06	1.9665e-05
hsa-miR-6847-5p	5	29	0.53142	3.22609	2.60186	Up	3.5271e-05	0.000129394
hsa-miR-5587-5p	5	29	0.53142	3.22609	2.60186	Up	3.5271e-05	0.000129211
hsa-miR-596	10	58	1.06284	6.45218	2.60186	Up	3.34344e-09	1.89072e-08
hsa-miR-4258	5	29	0.53142	3.22609	2.60186	Up	3.5271e-05	0.000129028
hsa-miR-6514-3p	88	510	9.35299	56.7346	2.60073	Up	3.9203e-70	1.0688e-68
hsa-miR-7851-3p	8	46	0.850272	5.11724	2.58937	Up	1.63713e-07	7.89603e-07
hsa-miR-1470	8	46	0.850272	5.11724	2.58937	Up	1.63713e-07	7.88135e-07
hsa-miR-5088-5p	4	23	0.425136	2.55862	2.58937	Up	0.00025946	0.000800955
hsa-miR-6768-5p	4	23	0.425136	2.55862	2.58937	Up	0.00025946	0.000800002
hsa-miR-525-3p	4	23	0.425136	2.55862	2.58937	Up	0.00025946	0.00079905
hsa-miR-1251-3p	55	315	5.84562	35.042	2.58366	Up	1.32582e-43	2.38464e-42
hsa-miR-3692-5p	7	40	0.743988	4.44978	2.58038	Up	1.15747e-06	5.10705e-06
hsa-miR-1261	889	5079	94.4865	565.01	2.5801	Up	0	0
hsa-miR-511-5p	6	34	0.637704	3.78231	2.56831	Up	8.2622e-06	3.24229e-05
hsa-miR-5089-5p	21	119	2.23196	13.2381	2.56831	Up	2.86964e-17	2.53664e-16
hsa-miR-6073	11	62	1.16912	6.89715	2.56057	Up	1.36428e-09	7.94043e-09
hsa-miR-3144-3p	8	45	0.850272	5.006	2.55766	Up	2.75942e-07	1.29708e-06
hsa-miR-320d	31	174	3.2948	19.3565	2.55456	Up	1.91102e-24	2.17086e-23
hsa-miR-4474-5p	51	283	5.42049	31.4822	2.53804	Up	1.60692e-38	2.61756e-37
hsa-miR-513c-3p	57	315	6.05819	35.042	2.53213	Up	1.39996e-42	2.46659e-41
hsa-miR-153-3p	21	116	2.23196	12.9044	2.53147	Up	1.34284e-16	1.1632e-15
hsa-miR-668-3p	35	193	3.71994	21.4702	2.52898	Up	1.21453e-26	1.45631e-25
hsa-miR-2392	174	958	18.4934	106.572	2.52675	Up	9.70838e-126	4.57176e-124
hsa-miR-5188	12	66	1.27541	7.34213	2.52524	Up	5.54446e-10	3.34735e-09
hsa-miR-363-5p	10	55	1.06284	6.11844	2.52524	Up	1.58868e-08	8.41446e-08
hsa-miR-7114-3p	6	33	0.637704	3.67107	2.52524	Up	1.393e-05	5.35292e-05
hsa-miR-4797-3p	9	49	0.956556	5.45098	2.51059	Up	1.10781e-07	5.42388e-07
hsa-miR-1915-3p	7	38	0.743988	4.22729	2.50638	Up	3.27804e-06	1.34978e-05
hsa-miR-6780b-5p	5	27	0.53142	3.0036	2.49877	Up	0.000100749	0.000340207
hsa-miR-7112-3p	5	27	0.53142	3.0036	2.49877	Up	0.000100749	0.000339764
hsa-miR-891a-5p	5	27	0.53142	3.0036	2.49877	Up	0.000100749	0.000339322
hsa-miR-4699-3p	5	27	0.53142	3.0036	2.49877	Up	0.000100749	0.000338882
hsa-miR-933	5	27	0.53142	3.0036	2.49877	Up	0.000100749	0.000338442
hsa-miR-5694	21	113	2.23196	12.5706	2.49367	Up	6.21316e-16	5.20779e-15
hsa-miR-626	8	43	0.850272	4.78351	2.49207	Up	7.7692e-07	3.47534e-06
hsa-miR-3138	54	290	5.73934	32.2609	2.49083	Up	1.45401e-38	2.38348e-37
hsa-miR-4501	11	59	1.16912	6.56342	2.48902	Up	6.39844e-09	3.52595e-08
hsa-miR-506-3p	14	75	1.48798	8.34333	2.48727	Up	5.45644e-11	3.41357e-10
hsa-miR-656-5p	617	3303	65.5772	367.44	2.48624	Up	0	0
hsa-miR-6766-5p	20	107	2.12568	11.9032	2.48535	Up	4.20542e-15	3.38262e-14
hsa-miR-4690-3p	6	32	0.637704	3.55982	2.48085	Up	2.3393e-05	8.71768e-05
hsa-miR-128-2-5p	42	224	4.46393	24.9187	2.48085	Up	5.39662e-30	7.13125e-29
hsa-miR-937-3p	63	335	6.69589	37.2669	2.47655	Up	5.37092e-44	9.72775e-43
hsa-miR-4529-5p	24	127	2.55082	14.128	2.46953	Up	1.53583e-17	1.3764e-16
hsa-miR-138-2-3p	7	37	0.743988	4.11604	2.46791	Up	5.48772e-06	2.20018e-05
hsa-miR-5197-3p	8	42	0.850272	4.67227	2.45813	Up	1.29746e-06	5.68598e-06
hsa-miR-6765-5p	8	42	0.850272	4.67227	2.45813	Up	1.29746e-06	5.67638e-06
hsa-miR-760	8	42	0.850272	4.67227	2.45813	Up	1.29746e-06	5.66681e-06
hsa-miR-3921	41	214	4.35764	23.8063	2.44972	Up	2.69944e-28	3.41051e-27
hsa-miR-6515-5p	23	120	2.44453	13.3493	2.44914	Up	1.71325e-16	1.4742e-15
hsa-miR-3617-3p	19	99	2.0194	11.0132	2.44724	Up	7.83424e-14	5.84746e-13
hsa-miR-429	5	26	0.53142	2.89235	2.44432	Up	0.000169087	0.000539328
hsa-miR-410-5p	21	109	2.23196	12.1256	2.44167	Up	4.70234e-15	3.75897e-14
hsa-miR-3120-5p	17	88	1.80683	9.78951	2.43778	Up	2.17192e-12	1.45732e-11
hsa-miR-676-5p	6	31	0.637704	3.44858	2.43504	Up	3.91212e-05	0.000142309
hsa-miR-8077	19	98	2.0194	10.902	2.43259	Up	1.29617e-13	9.56433e-13
hsa-miR-3156-3p	7	36	0.743988	4.0048	2.42838	Up	9.15292e-06	3.57558e-05
hsa-miR-4734	50	257	5.3142	28.5898	2.42758	Up	2.6211e-33	3.79254e-32
hsa-miR-6787-5p	76	389	8.07759	43.2741	2.42151	Up	1.88922e-49	3.79308e-48
hsa-miR-4633-3p	132	673	14.0295	74.8675	2.41588	Up	4.44478e-84	1.439e-82
hsa-miR-6791-5p	18	91	1.91311	10.1232	2.40368	Up	1.44587e-12	9.9069e-12
hsa-miR-320c	37	187	3.93251	20.8027	2.40325	Up	2.37162e-24	2.68231e-23
hsa-miR-6728-5p	67	336	7.12103	37.3781	2.39204	Up	2.72838e-42	4.77467e-41
hsa-miR-6717-5p	13	65	1.38169	7.23089	2.38774	Up	2.81588e-09	1.60289e-08
hsa-miR-4656	6	30	0.637704	3.33733	2.38774	Up	6.51372e-05	0.00022706
hsa-miR-7155-3p	9	45	0.956556	5.006	2.38774	Up	8.49562e-07	3.79373e-06
hsa-miR-4789-5p	6	30	0.637704	3.33733	2.38774	Up	6.51372e-05	0.000226754
hsa-miR-1273e	9	45	0.956556	5.006	2.38774	Up	8.49562e-07	3.7872e-06
hsa-miR-139-3p	10	50	1.06284	5.56222	2.38774	Up	2.02614e-07	9.66428e-07
hsa-miR-375	7	35	0.743988	3.89355	2.38774	Up	1.5207e-05	5.81773e-05
hsa-miR-3156-5p	7	35	0.743988	3.89355	2.38774	Up	1.5207e-05	5.80915e-05
hsa-miR-619-3p	7	35	0.743988	3.89355	2.38774	Up	1.5207e-05	5.80059e-05
hsa-miR-491-5p	8	40	0.850272	4.44978	2.38774	Up	3.58194e-06	1.47024e-05
hsa-miR-4638-3p	8	40	0.850272	4.44978	2.38774	Up	3.58194e-06	1.46792e-05
hsa-miR-4713-3p	5	25	0.53142	2.78111	2.38774	Up	0.000282346	0.000867469
hsa-miR-4749-5p	5	25	0.53142	2.78111	2.38774	Up	0.000282346	0.000866441
hsa-miR-302d-3p	5	25	0.53142	2.78111	2.38774	Up	0.000282346	0.000865416
hsa-miR-7843-5p	5	25	0.53142	2.78111	2.38774	Up	0.000282346	0.000864393
hsa-miR-4653-5p	11	55	1.16912	6.11844	2.38774	Up	4.85402e-08	2.48457e-07
hsa-miR-873-3p	47	234	4.99535	26.0312	2.38158	Up	9.1281e-30	1.19403e-28
hsa-miR-6131	40	199	4.25136	22.1376	2.3805	Up	1.59079e-25	1.83935e-24
hsa-miR-1273c	81	402	8.60901	44.7203	2.37701	Up	6.91148e-50	1.39849e-48
hsa-miR-6715b-3p	26	129	2.76338	14.3505	2.3766	Up	5.09374e-17	4.45702e-16
hsa-miR-549a	13	64	1.38169	7.11964	2.36537	Up	4.63766e-09	2.57758e-08
hsa-miR-6084	11	54	1.16912	6.0072	2.36126	Up	8.00264e-08	3.99361e-07
hsa-miR-3130-3p	11	54	1.16912	6.0072	2.36126	Up	8.00264e-08	3.98593e-07
hsa-miR-6857-5p	22	108	2.33825	12.0144	2.36126	Up	2.29842e-14	1.75086e-13
hsa-miR-3189-3p	10	49	1.06284	5.45098	2.35859	Up	3.34262e-07	1.55429e-06
hsa-miR-5705	9	44	0.956556	4.89475	2.35531	Up	1.40268e-06	6.04482e-06
hsa-miR-369-5p	242	1183	25.7207	131.602	2.35518	Up	9.34586e-142	4.84116e-140
hsa-miR-8052	8	39	0.850272	4.33853	2.35121	Up	5.91976e-06	2.36608e-05
hsa-miR-1273h-3p	594	2895	63.1327	322.053	2.35084	Up	0	0
hsa-miR-4518	23	112	2.44453	12.4594	2.3496	Up	9.23256e-15	7.24616e-14
hsa-miR-6721-5p	7	34	0.743988	3.78231	2.34592	Up	2.51628e-05	9.36374e-05
hsa-miR-3613-3p	28	136	2.97595	15.1292	2.34592	Up	1.35578e-17	1.21926e-16
hsa-miR-518e-3p	6	29	0.637704	3.22609	2.33883	Up	0.000107952	0.000357998
hsa-miR-4687-3p	6	29	0.637704	3.22609	2.33883	Up	0.000107952	0.000357541
hsa-miR-7162-3p	6	29	0.637704	3.22609	2.33883	Up	0.000107952	0.000357084
hsa-miR-567	96	463	10.2033	51.5062	2.33571	Up	5.88952e-56	1.25032e-54
hsa-miR-618	22	106	2.33825	11.7919	2.3343	Up	6.15876e-14	4.63697e-13
hsa-miR-369-3p	1528	7337	162.402	816.2	2.32935	Up	0	0
hsa-miR-4540	10	48	1.06284	5.33973	2.32884	Up	5.49754e-07	2.5068e-06
hsa-miR-580-5p	20	96	2.12568	10.6795	2.32884	Up	1.02741e-12	7.13403e-12
hsa-miR-4499	104	499	11.0535	55.511	2.32826	Up	6.21388e-60	1.41175e-58
hsa-miR-4484	33	158	3.50737	17.5766	2.32519	Up	5.38248e-20	5.20173e-19
hsa-miR-3122	9	43	0.956556	4.78351	2.32215	Up	2.30806e-06	9.72012e-06
hsa-miR-4530	254	1212	26.9961	134.828	2.3203	Up	2.0532e-142	1.08526e-140
hsa-miR-3934-3p	13	62	1.38169	6.89715	2.31956	Up	1.24882e-08	6.66896e-08
hsa-miR-4680-5p	12	57	1.27541	6.34093	2.31374	Up	5.1811e-08	2.63119e-07
hsa-miR-3663-3p	8	38	0.850272	4.22729	2.31374	Up	9.74648e-06	3.80171e-05
hsa-miR-3648	353	1675	37.5183	186.334	2.31223	Up	3.35234e-195	2.1177e-193
hsa-miR-5696	7	33	0.743988	3.67107	2.30285	Up	4.14592e-05	0.000149138
hsa-miR-4745-5p	14	66	1.48798	7.34213	2.30285	Up	4.9353e-09	2.73129e-08
hsa-miR-4663	10	47	1.06284	5.22849	2.29847	Up	9.01292e-07	4.0109e-06
hsa-miR-921	10	47	1.06284	5.22849	2.29847	Up	9.01292e-07	4.00402e-06
hsa-miR-4508	23	108	2.44453	12.0144	2.29713	Up	6.55158e-14	4.90422e-13
hsa-miR-8058	27	126	2.86967	14.0168	2.2882	Up	6.33144e-16	5.28982e-15
hsa-miR-499b-3p	6	28	0.637704	3.11484	2.2882	Up	0.000178036	0.000563019
hsa-miR-7108-5p	6	28	0.637704	3.11484	2.2882	Up	0.000178036	0.000562333
hsa-miR-3670	6	28	0.637704	3.11484	2.2882	Up	0.000178036	0.000561648
hsa-miR-3191-5p	9	42	0.956556	4.67227	2.2882	Up	3.78446e-06	1.54358e-05
hsa-miR-1276	53	247	5.63305	27.4774	2.28625	Up	8.63404e-30	1.13514e-28
hsa-miR-4684-5p	11	51	1.16912	5.67346	2.2788	Up	3.52476e-07	1.6273e-06
hsa-miR-6815-5p	11	51	1.16912	5.67346	2.2788	Up	3.52476e-07	1.6244e-06
hsa-miR-582-5p	68	315	7.22731	35.042	2.27755	Up	2.2115e-37	3.45047e-36
hsa-miR-200b-5p	8	37	0.850272	4.11604	2.27526	Up	1.59837e-05	6.04347e-05
hsa-miR-6507-3p	13	60	1.38169	6.67466	2.27226	Up	3.32876e-08	1.7382e-07
hsa-miR-4667-5p	39	180	4.14508	20.024	2.27226	Up	5.9913e-22	6.23191e-21
hsa-miR-6499-5p	10	46	1.06284	5.11724	2.26744	Up	1.47275e-06	6.32574e-06
hsa-miR-1298-5p	130	596	13.8169	66.3017	2.26261	Up	1.13358e-68	2.96563e-67
hsa-miR-6502-5p	7	32	0.743988	3.55982	2.25845	Up	6.80044e-05	0.000236101
hsa-miR-372-3p	14	64	1.48798	7.11964	2.25845	Up	1.30959e-08	6.97908e-08
hsa-miR-4497	58	263	6.16447	29.2573	2.24675	Up	6.23056e-31	8.58359e-30
hsa-miR-5091	57	257	6.05819	28.5898	2.23854	Up	4.02834e-30	5.35046e-29
hsa-miR-6865-5p	12	54	1.27541	6.0072	2.23573	Up	2.24338e-07	1.06612e-06
hsa-miR-212-3p	10	45	1.06284	5.006	2.23573	Up	2.3983e-06	9.98649e-06
hsa-miR-3200-3p	6	27	0.637704	3.0036	2.23573	Up	0.000292098	0.00088795
hsa-miR-7855-5p	109	488	11.585	54.2873	2.22836	Up	1.99753e-55	4.17226e-54
hsa-miR-6798-5p	7	31	0.743988	3.44858	2.21265	Up	0.000111021	0.000364905
hsa-miR-4273	14	62	1.48798	6.89715	2.21265	Up	3.43966e-08	1.7925e-07
hsa-miR-4468	41	180	4.35764	20.024	2.20011	Up	4.38252e-21	4.43388e-20
hsa-miR-761	8	35	0.850272	3.89355	2.19509	Up	4.24502e-05	0.000152491
hsa-miR-4717-5p	11	48	1.16912	5.33973	2.19134	Up	1.50967e-06	6.47359e-06
hsa-miR-378d	14	61	1.48798	6.78591	2.18919	Up	5.55218e-08	2.80862e-07
hsa-miR-3664-3p	38	165	4.03879	18.3553	2.1842	Up	2.83926e-19	2.70356e-18
hsa-miR-3619-3p	9	39	0.956556	4.33853	2.18129	Up	1.63101e-05	6.15788e-05
hsa-miR-665	82	355	8.71529	39.4918	2.17993	Up	1.27928e-39	2.13763e-38
hsa-miR-4700-5p	16	69	1.70054	7.67586	2.17433	Up	8.53332e-09	4.64313e-08
hsa-miR-4494	10	43	1.06284	4.78351	2.17014	Up	6.29174e-06	2.51088e-05
hsa-miR-5585-3p	38	163	4.03879	18.1328	2.16661	Up	7.27196e-19	6.82405e-18
hsa-miR-4694-5p	14	60	1.48798	6.67466	2.16534	Up	8.93732e-08	4.4007e-07
hsa-miR-513a-3p	29	124	3.08224	13.7943	2.16202	Up	1.18977e-14	9.22608e-14
hsa-miR-6741-5p	23	98	2.44453	10.902	2.15696	Up	7.8624e-12	5.12937e-11
hsa-miR-7161-5p	8	34	0.850272	3.78231	2.15327	Up	6.87194e-05	0.000238264
hsa-miR-7-1-3p	3678	15514	390.913	1725.85	2.14239	Up	0	0
hsa-miR-548az-5p	23	97	2.44453	10.7907	2.14216	Up	1.25703e-11	8.15964e-11
hsa-miR-541-5p	37	156	3.93251	17.3541	2.14176	Up	7.42538e-18	6.72438e-17
hsa-miR-7153-3p	181	760	19.2374	84.5457	2.13582	Up	1.17647e-80	3.58479e-79
hsa-miR-1324	18	75	1.91311	8.34333	2.1247	Up	3.37488e-09	1.90434e-08
hsa-miR-9500	31	129	3.2948	14.3505	2.12284	Up	7.60762e-15	6.00724e-14
hsa-miR-3143	143	595	15.1986	66.1904	2.12268	Up	5.35836e-63	1.30926e-61
hsa-miR-378f	13	54	1.38169	6.0072	2.12026	Up	5.89452e-07	2.66436e-06
hsa-miR-3169	13	54	1.38169	6.0072	2.12026	Up	5.89452e-07	2.65972e-06
hsa-miR-6812-5p	7	29	0.743988	3.22609	2.11643	Up	0.000291446	0.000889099
hsa-miR-218-1-3p	7	29	0.743988	3.22609	2.11643	Up	0.000291446	0.000888053
hsa-miR-503-3p	7	29	0.743988	3.22609	2.11643	Up	0.000291446	0.00088701
hsa-miR-3139	14	58	1.48798	6.45218	2.11643	Up	2.29586e-07	1.08906e-06
hsa-miR-378e	23	95	2.44453	10.5682	2.1121	Up	3.19518e-11	2.02335e-10
hsa-miR-24-2-5p	23	95	2.44453	10.5682	2.1121	Up	3.19518e-11	2.01842e-10
hsa-miR-6125	8	33	0.850272	3.67107	2.1102	Up	0.000110719	0.000364838
hsa-miR-6777-5p	8	33	0.850272	3.67107	2.1102	Up	0.000110719	0.000364374
hsa-miR-3193	26	107	2.76338	11.9032	2.10684	Up	1.97063e-12	1.33611e-11
hsa-miR-1208	20	82	2.12568	9.12204	2.10143	Up	8.30806e-10	4.93529e-09
hsa-miR-675-5p	12	49	1.27541	5.45098	2.09556	Up	2.42592e-06	1.00853e-05
hsa-miR-4315	48	196	5.10163	21.8039	2.09556	Up	1.88987e-21	1.94237e-20
hsa-miR-4794	53	216	5.63305	24.0288	2.09278	Up	1.90633e-23	2.07453e-22
hsa-miR-1272	29	118	3.08224	13.1268	2.09047	Up	1.93873e-13	1.41048e-12
hsa-miR-6733-5p	18	73	1.91311	8.12084	2.08571	Up	8.55914e-09	4.64742e-08
hsa-miR-892c-5p	20	81	2.12568	9.0108	2.08373	Up	1.31998e-09	7.71728e-09
hsa-miR-3182	375	1514	39.8565	168.424	2.07921	Up	4.42132e-153	2.54472e-151
hsa-miR-509-3-5p	8	32	0.850272	3.55982	2.06581	Up	0.000177503	0.00056271
hsa-miR-584-3p	8	32	0.850272	3.55982	2.06581	Up	0.000177503	0.000562022
hsa-miR-6753-3p	28	112	2.97595	12.4594	2.06581	Up	1.22663e-12	8.47192e-12
hsa-miR-6776-3p	16	64	1.70054	7.11964	2.06581	Up	8.8639e-08	4.3812e-07
hsa-miR-4269	14	56	1.48798	6.22969	2.06581	Up	5.82684e-07	2.643e-06
hsa-miR-1288-5p	11	44	1.16912	4.89475	2.06581	Up	1.0001e-05	3.87763e-05
hsa-miR-4639-5p	11	44	1.16912	4.89475	2.06581	Up	1.0001e-05	3.87184e-05
hsa-miR-323b-3p	558	2219	59.3065	246.851	2.05738	Up	3.5204e-220	2.46428e-218
hsa-miR-767-5p	75	298	7.9713	33.1508	2.05616	Up	5.00152e-31	6.96448e-30
hsa-miR-7849-3p	24	95	2.55082	10.5682	2.0507	Up	7.95194e-11	4.96278e-10
hsa-miR-5190	19	75	2.0194	8.34333	2.0467	Up	8.42798e-09	4.59547e-08
hsa-miR-4746-3p	17	67	1.80683	7.45338	2.04443	Up	5.48862e-08	2.7819e-07
hsa-miR-3908	13	51	1.38169	5.67346	2.03779	Up	2.37802e-06	9.95004e-06
hsa-miR-5000-5p	13	51	1.38169	5.67346	2.03779	Up	2.37802e-06	9.93399e-06
hsa-miR-4765	9	35	0.956556	3.89355	2.02517	Up	0.000107833	0.000358519
hsa-miR-4439	9	35	0.956556	3.89355	2.02517	Up	0.000107833	0.00035806
hsa-miR-4713-5p	8	31	0.850272	3.44858	2.02	Up	0.000283088	0.000865641
hsa-miR-659-3p	8	31	0.850272	3.44858	2.02	Up	0.000283088	0.00086462
hsa-miR-4280	15	58	1.59426	6.45218	2.0169	Up	5.68368e-07	2.58258e-06
hsa-miR-7161-3p	17	65	1.80683	7.23089	2.00071	Up	1.36436e-07	6.6298e-07
hsa-miR-3529-5p	10	38	1.06284	4.22729	1.99181	Up	6.54026e-05	0.000227373
hsa-miR-4423-3p	14	53	1.48798	5.89595	1.98637	Up	2.29946e-06	9.69968e-06
hsa-miR-5589-5p	51	193	5.42049	21.4702	1.98584	Up	1.04827e-19	1.00185e-18
hsa-miR-3142	23	87	2.44453	9.67826	1.98519	Up	1.23158e-09	7.21674e-09
hsa-miR-6840-3p	9	34	0.956556	3.78231	1.98335	Up	0.000170878	0.000544371
hsa-miR-4801	9	34	0.956556	3.78231	1.98335	Up	0.000170878	0.000543703
hsa-miR-6750-3p	9	34	0.956556	3.78231	1.98335	Up	0.000170878	0.000543036
hsa-miR-7977	154	577	16.3677	64.188	1.97145	Up	3.1138e-55	6.45179e-54
hsa-miR-636	14	52	1.48798	5.78471	1.95889	Up	3.60888e-06	1.47662e-05
hsa-miR-105-5p	38	141	4.03879	15.6855	1.95743	Up	1.64654e-14	1.26544e-13
hsa-miR-490-3p	75	277	7.9713	30.8147	1.95073	Up	5.78936e-27	7.00675e-26
hsa-miR-6500-5p	93	342	9.88441	38.0456	1.9445	Up	8.87818e-33	1.27041e-31
hsa-miR-4473	36	132	3.82622	14.6843	1.94028	Up	1.61654e-13	1.18607e-12
hsa-miR-3130-5p	14	51	1.48798	5.67346	1.93088	Up	5.64346e-06	2.25913e-05
hsa-miR-4255	36	131	3.82622	14.573	1.92931	Up	2.5059e-13	1.80286e-12
hsa-miR-4800-3p	11	40	1.16912	4.44978	1.9283	Up	6.2166e-05	0.000216995
hsa-miR-1266-5p	16	58	1.70054	6.45218	1.92379	Up	1.33755e-06	5.83206e-06
hsa-miR-200a-3p	63	228	6.69589	25.3637	1.92142	Up	5.24296e-22	5.47551e-21
hsa-miR-3943	13	47	1.38169	5.22849	1.91996	Up	1.45263e-05	5.57379e-05
hsa-miR-3176	26	94	2.76338	10.457	1.91996	Up	6.94584e-10	4.15467e-09
hsa-miR-520g-5p	20	72	2.12568	8.0096	1.9138	Up	7.6435e-08	3.82175e-07
hsa-miR-320b	72	258	7.65245	28.7011	1.90711	Up	1.8865e-24	2.15244e-23
hsa-miR-212-5p	23	82	2.44453	9.12204	1.8998	Up	1.12394e-08	6.0269e-08
hsa-miR-2277-3p	62	221	6.58961	24.585	1.89951	Up	4.79074e-21	4.82802e-20
hsa-miR-4418	16	57	1.70054	6.34093	1.8987	Up	2.07924e-06	8.7994e-06
hsa-miR-6735-5p	18	64	1.91311	7.11964	1.89588	Up	4.94946e-07	2.26086e-06
hsa-miR-15a-5p	150	532	15.9426	59.182	1.89227	Up	3.47672e-48	6.77045e-47
hsa-miR-1909-3p	26	92	2.76338	10.2345	1.88893	Up	1.66127e-09	9.58283e-09
hsa-miR-3173-5p	13	46	1.38169	5.11724	1.88893	Up	2.2615e-05	8.46428e-05
hsa-miR-8085	25	88	2.6571	9.78951	1.88138	Up	4.19354e-09	2.34079e-08
hsa-miR-5698	12	42	1.27541	4.67227	1.87316	Up	5.832e-05	0.000204396
hsa-miR-1323	16	56	1.70054	6.22969	1.87316	Up	3.22108e-06	1.33268e-05
hsa-miR-1193	18	63	1.91311	7.0084	1.87316	Up	7.65672e-07	3.43095e-06
hsa-miR-1284	14	49	1.48798	5.45098	1.87316	Up	1.36449e-05	5.25116e-05
hsa-miR-3653-3p	15	52	1.59426	5.78471	1.85936	Up	8.23548e-06	3.23671e-05
hsa-miR-3622b-5p	13	45	1.38169	5.006	1.85722	Up	3.50608e-05	0.000128805
hsa-let-7d-3p	1031	3559	109.579	395.919	1.85324	Up	1.6636e-302	1.38991e-300
hsa-miR-6730-3p	20	69	2.12568	7.67586	1.8524	Up	2.81976e-07	1.32304e-06
hsa-miR-1257	20	69	2.12568	7.67586	1.8524	Up	2.81976e-07	1.32065e-06
hsa-miR-4435	20	69	2.12568	7.67586	1.8524	Up	2.81976e-07	1.31826e-06
hsa-miR-874-3p	18	62	1.91311	6.89715	1.85008	Up	1.18072e-06	5.20077e-06
hsa-miR-3129-5p	299	1026	31.7789	114.137	1.84462	Up	5.65392e-88	1.87739e-86
hsa-miR-2116-3p	20	68	2.12568	7.56462	1.83134	Up	4.33166e-07	1.98918e-06
hsa-miR-466	15	51	1.59426	5.67346	1.83134	Up	1.26967e-05	4.90812e-05
hsa-miR-5693	13	44	1.38169	4.89475	1.8248	Up	5.4121e-05	0.000191494
hsa-miR-2277-5p	21	71	2.23196	7.89835	1.82324	Up	2.62462e-07	1.23596e-06
hsa-miR-1254	16	54	1.70054	6.0072	1.8207	Up	7.64796e-06	3.01037e-05
hsa-miR-6783-5p	11	37	1.16912	4.11604	1.81583	Up	0.000233236	0.000722585
hsa-miR-1244	12	40	1.27541	4.44978	1.80277	Up	0.000139171	0.000451129
hsa-miR-612	12	40	1.27541	4.44978	1.80277	Up	0.000139171	0.000450565
hsa-miR-1275	33	110	3.50737	12.2369	1.80277	Up	1.87738e-10	1.15223e-09
hsa-miR-200b-3p	15	50	1.59426	5.56222	1.80277	Up	1.94978e-05	7.35069e-05
hsa-miR-3937	26	86	2.76338	9.56702	1.79163	Up	2.15166e-08	1.13268e-07
hsa-miR-1268a	24	79	2.55082	8.78831	1.78463	Up	8.90526e-08	4.39326e-07
hsa-miR-450a-2-3p	45	148	4.78278	16.4642	1.78341	Up	2.1562e-13	1.5643e-12
hsa-miR-510-3p	20	65	2.12568	7.23089	1.76625	Up	1.5415e-06	6.59917e-06
hsa-miR-2110	13	42	1.38169	4.67227	1.75769	Up	0.000127212	0.0004134
hsa-miR-4751	23	74	2.44453	8.23209	1.7517	Up	3.39022e-07	1.57078e-06
hsa-miR-6512-3p	19	61	2.0194	6.78591	1.74862	Up	3.88392e-06	1.58166e-05
hsa-miR-635	15	48	1.59426	5.33973	1.74388	Up	4.54182e-05	0.000162701
hsa-miR-219a-1-3p	21	67	2.23196	7.45338	1.73958	Up	1.40894e-06	6.06172e-06
hsa-miR-7705	32	102	3.40109	11.3469	1.73823	Up	2.45844e-09	1.4056e-08
hsa-miR-5095	38	119	4.03879	13.2381	1.7127	Up	1.84908e-10	1.13756e-09
hsa-miR-6812-3p	18	56	1.91311	6.22969	1.70324	Up	1.47763e-05	5.66135e-05
hsa-miR-548at-3p	14	43	1.48798	4.78351	1.68472	Up	0.000174461	0.000553742
hsa-miR-1229-3p	15	46	1.59426	5.11724	1.68248	Up	0.00010398	0.000346155
hsa-miR-4709-5p	25	76	2.6571	8.45457	1.66988	Up	6.31462e-07	2.84432e-06
hsa-miR-2355-3p	23	69	2.44453	7.67586	1.65077	Up	2.59694e-06	1.0779e-05
hsa-miR-146b-3p	14	42	1.48798	4.67227	1.65077	Up	0.00026249	0.000807422
hsa-miR-1273g-3p	53	158	5.63305	17.5766	1.64167	Up	1.14859e-12	7.95411e-12
hsa-miR-4791	1214	3588	129.029	399.145	1.62922	Up	2.84596e-250	2.10601e-248
hsa-miR-4741	16	47	1.70054	5.22849	1.6204	Up	0.000139246	0.000450246
hsa-miR-4792	40	117	4.25136	13.0156	1.61424	Up	1.62691e-09	9.40559e-09
hsa-miR-2113	25	73	2.6571	8.12084	1.61178	Up	2.07712e-06	8.80481e-06
hsa-miR-92b-5p	24	69	2.55082	7.67586	1.58937	Up	5.0989e-06	2.05064e-05
hsa-miR-1303	44	125	4.6765	13.9056	1.57216	Up	1.0288e-09	6.0559e-09
hsa-miR-150-5p	41	116	4.35764	12.9044	1.56624	Up	4.5943e-09	2.55898e-08
hsa-miR-424-3p	300	846	31.8852	94.1128	1.5615	Up	1.41998e-56	3.03947e-55
hsa-miR-215-5p	61	172	6.48333	19.134	1.56134	Up	1.01e-12	7.03202e-12
hsa-miR-4502	33	93	3.50737	10.3457	1.56057	Up	1.72181e-07	8.27362e-07
hsa-miR-1268b	38	106	4.03879	11.7919	1.5458	Up	3.00322e-08	1.57138e-07
hsa-miR-6718-5p	138	383	14.6672	42.6066	1.53848	Up	6.39018e-26	7.48894e-25
hsa-miR-4455	110	304	11.6912	33.8183	1.53238	Up	9.07524e-21	9.0057e-20
hsa-miR-216b-5p	38	105	4.03879	11.6807	1.53213	Up	4.37518e-08	2.24836e-07
hsa-miR-433-5p	49	135	5.20792	15.018	1.52791	Up	5.62234e-10	3.38648e-09
hsa-miR-1306-5p	44	121	4.6765	13.4606	1.52524	Up	4.64444e-09	2.57582e-08
hsa-miR-106a-5p	19	52	2.0194	5.78471	1.51832	Up	0.00014119	0.000455961
hsa-miR-4677-5p	19	52	2.0194	5.78471	1.51832	Up	0.00014119	0.000455394
hsa-miR-3167	22	60	2.33825	6.67466	1.51327	Up	4.4569e-05	0.00015988
hsa-miR-641	24	64	2.55082	7.11964	1.48085	Up	3.41476e-05	0.000125628
hsa-miR-6751-5p	20	53	2.12568	5.89595	1.4718	Up	0.000179738	0.000566327
hsa-miR-145-5p	37	98	3.93251	10.902	1.47106	Up	3.1652e-07	1.47444e-06
hsa-miR-1911-3p	21	55	2.23196	6.11844	1.45485	Up	0.000156428	0.000500802
hsa-miR-3127-5p	26	68	2.76338	7.56462	1.45283	Up	2.59876e-05	9.64296e-05
hsa-miR-3913-5p	67	175	7.12103	19.4678	1.45093	Up	1.28886e-11	8.34534e-11
hsa-miR-6786-3p	31	80	3.2948	8.89955	1.43354	Up	6.29558e-06	2.50855e-05
hsa-miR-378c	126	324	13.3918	36.0432	1.42838	Up	8.78576e-20	8.42782e-19
hsa-miR-4438	26	65	2.76338	7.23089	1.38774	Up	7.6488e-05	0.000262389
hsa-miR-6727-3p	24	60	2.55082	6.67466	1.38774	Up	0.000146086	0.0004706
hsa-miR-6822-3p	103	256	10.9473	28.4786	1.37931	Up	4.09286e-15	3.30234e-14
hsa-miR-30b-3p	26	64	2.76338	7.11964	1.36537	Up	0.000108776	0.000359349
hsa-miR-31-5p	233	573	24.7642	63.743	1.36401	Up	2.35046e-31	3.29064e-30
hsa-miR-25-5p	35	86	3.71994	9.56702	1.36279	Up	7.2021e-06	2.85658e-05
hsa-miR-221-5p	478	1161	50.8038	129.155	1.34609	Up	1.92633e-60	4.45463e-59
hsa-miR-598-3p	374	906	39.7502	100.787	1.34228	Up	2.50886e-47	4.67478e-46
hsa-miR-487a-3p	127	306	13.4981	34.0408	1.33451	Up	7.0006e-17	6.08441e-16
hsa-miR-548an	37	89	3.93251	9.90075	1.33209	Up	7.55604e-06	2.97871e-05
hsa-miR-1260a	2770	6632	294.407	737.773	1.32537	Up	0	0
hsa-miR-505-3p	55	129	5.84562	14.3505	1.29568	Up	1.35813e-07	6.61194e-07
hsa-miR-383-5p	255	596	27.1024	66.3017	1.29062	Up	1.00535e-29	1.30847e-28
hsa-miR-1260b	3307	7723	351.481	859.141	1.28945	Up	0	0
hsa-miR-199a-3p	2398	5597	254.869	622.635	1.28863	Up	1.70297e-263	1.33658e-261
hsa-miR-337-5p	70	160	7.43988	17.7991	1.25845	Up	1.03087e-08	5.55082e-08
hsa-miR-708-3p	46	105	4.88906	11.6807	1.25649	Up	3.75128e-06	1.53246e-05
hsa-miR-16-2-3p	363	825	38.5811	91.7766	1.25023	Up	2.15098e-38	3.46027e-37
hsa-miR-2681-3p	35	79	3.71994	8.78831	1.24031	Up	7.50162e-05	0.000258024
hsa-miR-5707	47	106	4.99535	11.7919	1.23914	Up	4.43424e-06	1.80011e-05
hsa-miR-425-3p	34	76	3.61366	8.45457	1.22627	Up	0.00012113	0.000397626
hsa-miR-6500-3p	74	165	7.86502	18.3553	1.22268	Up	1.44785e-08	7.68429e-08
hsa-miR-30c-5p	3330	7412	353.926	824.544	1.22015	Up	0	0
hsa-miR-1287-5p	158	351	16.7929	39.0468	1.21735	Up	1.63069e-16	1.40783e-15
hsa-miR-619-5p	115	254	12.2227	28.2561	1.209	Up	3.2062e-12	2.12925e-11
hsa-miR-135b-5p	39	85	4.14508	9.45577	1.1898	Up	7.52768e-05	0.000258577
hsa-miR-132-5p	131	284	13.9232	31.5934	1.18213	Up	5.1234e-13	3.63551e-12
hsa-miR-30e-5p	147	311	15.6238	34.597	1.14691	Up	1.93457e-13	1.41142e-12
hsa-miR-23b-3p	1019	2144	108.303	238.508	1.13896	Up	3.14042e-82	9.79962e-81
hsa-miR-3913-3p	73	153	7.75873	17.0204	1.13337	Up	3.50748e-07	1.62221e-06
hsa-miR-33b-3p	45	94	4.78278	10.457	1.12854	Up	7.19918e-05	0.000249276
hsa-miR-199b-3p	2357	4912	250.511	546.433	1.12517	Up	8.10216e-182	4.99633e-180
hsa-miR-323a-3p	1547	3205	164.421	356.538	1.11666	Up	1.0881e-117	4.61998e-116
hsa-miR-27a-3p	25779	53347	2739.9	5934.56	1.11502	Up	0	0
hsa-miR-1307-3p	821	1691	87.2592	188.114	1.10823	Up	4.01264e-62	9.62291e-61
hsa-miR-15b-5p	1971	4057	209.486	451.319	1.10729	Up	3.45322e-146	1.8633e-144
hsa-miR-4531	306	629	32.5229	69.9727	1.10534	Up	4.72986e-24	5.30318e-23
hsa-miR-130a-3p	184	375	19.5563	41.7167	1.09299	Up	1.11533e-14	8.67479e-14
hsa-miR-4321	65	132	6.90846	14.6843	1.08783	Up	5.28712e-06	2.12305e-05
hsa-miR-1285-3p	47	95	4.99535	10.5682	1.08107	Up	0.000125546	0.000411601
hsa-let-7d-5p	1550	3126	164.74	347.75	1.07786	Up	1.19297e-107	4.54381e-106
hsa-miR-26b-5p	844	1702	89.7037	189.338	1.07772	Up	1.93035e-59	4.34748e-58
hsa-miR-374c-3p	2285	4548	242.859	505.94	1.05885	Up	1.1191e-150	6.30104e-149
hsa-miR-1301-3p	154	306	16.3677	34.0408	1.05641	Up	1.40216e-11	9.03379e-11
hsa-miR-222-3p	648	1281	68.872	142.504	1.04901	Up	5.04718e-43	8.95356e-42
hsa-miR-28-5p	278	548	29.547	60.9619	1.0449	Up	3.36266e-19	3.19022e-18
hsa-miR-4451	194	381	20.6191	42.3841	1.03954	Up	1.09532e-13	8.12862e-13
hsa-miR-139-5p	143	276	15.1986	30.7035	1.01446	Up	6.62136e-10	3.97896e-09
hsa-miR-99a-5p	23227	44750	2468.66	4978.19	1.01189	Up	0	0
hsa-miR-548x-5p	85	24	9.03414	2.66987	-1.75862	Down	7.00076e-10	4.17787e-09
hsa-let-7a-2-3p	92	31	9.77813	3.44858	-1.50356	Down	6.86104e-09	3.77284e-08
hsa-miR-548aj-5p	86	33	9.14043	3.67107	-1.31606	Down	3.12232e-07	1.45708e-06
hsa-miR-548g-5p	82	39	8.71529	4.33853	-1.00634	Down	3.59818e-05	0.000131443
